# Supplementary material for: FluoroTome 1: An Apparatus for Tomographic Imaging of Radio-Fluorogenic (RFG) Gels
Source: Preprints.org preprint supplement (doi:10.20944/preprints201909.0205.v1), 2019-09-18
Supplement: Supplementary file 2 [file supplementary]

Archive with 6 entries (5 files):
- Supplemental info/
- Supplemental info/.DS_Store
- Supplemental info/3D movie.avi
- Supplemental info/External schematic.jpg
- Supplemental info/Internal schematic.jpg
- Supplemental info/User Manual.pdf
