# Supplementary figures and images for: FluoroTome 1: An Apparatus for Tomographic Imaging of Radio-Fluorogenic (RFG) Gels
Source: Preprints.org preprint supplement (doi:10.20944/preprints201909.0205.v1), 2019-09-18

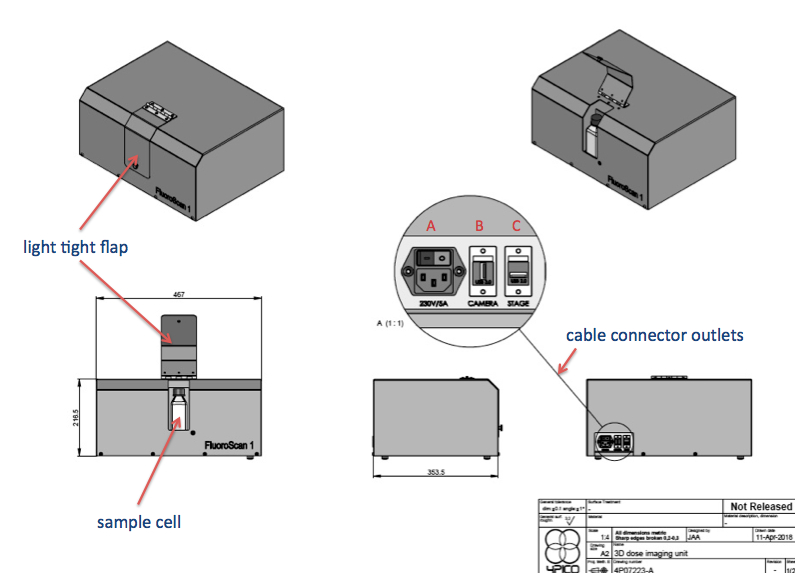

Supplement: Supplementary file 2 [file supplementary › Supplemental info/External schematic.jpg]

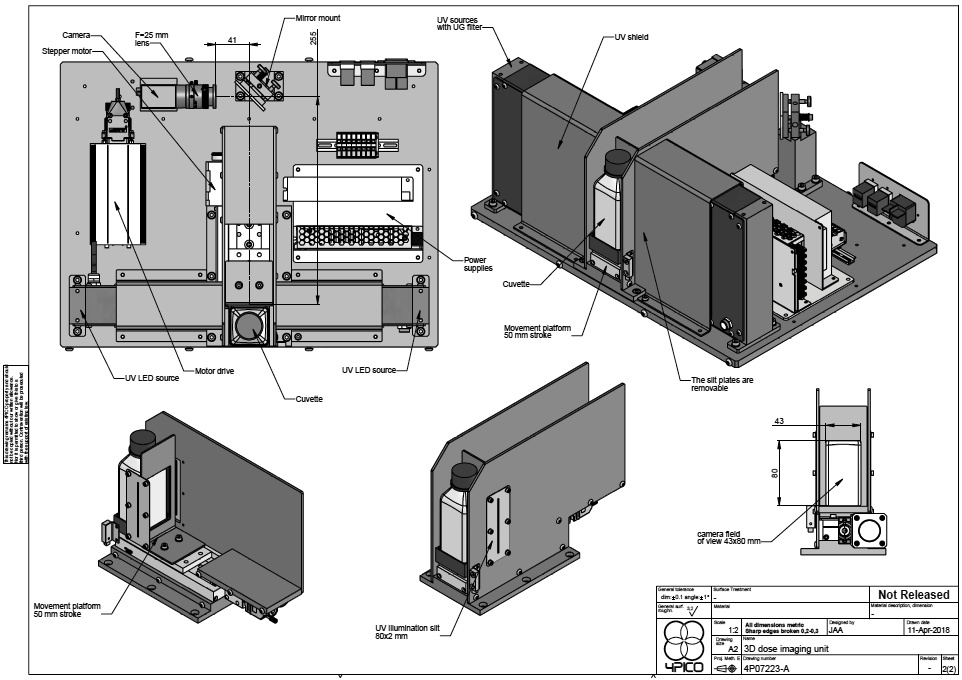

Supplement: Supplementary file 2 [file supplementary › Supplemental info/Internal schematic.jpg]
